# Supplementary material
Source: publisher figshare collection journal article supplement (https://acs.figshare.com/ndownloader/files/5684259)
Supplement: Supplementary file 1 [file 5684259]

Supporting Information, Fig. S1

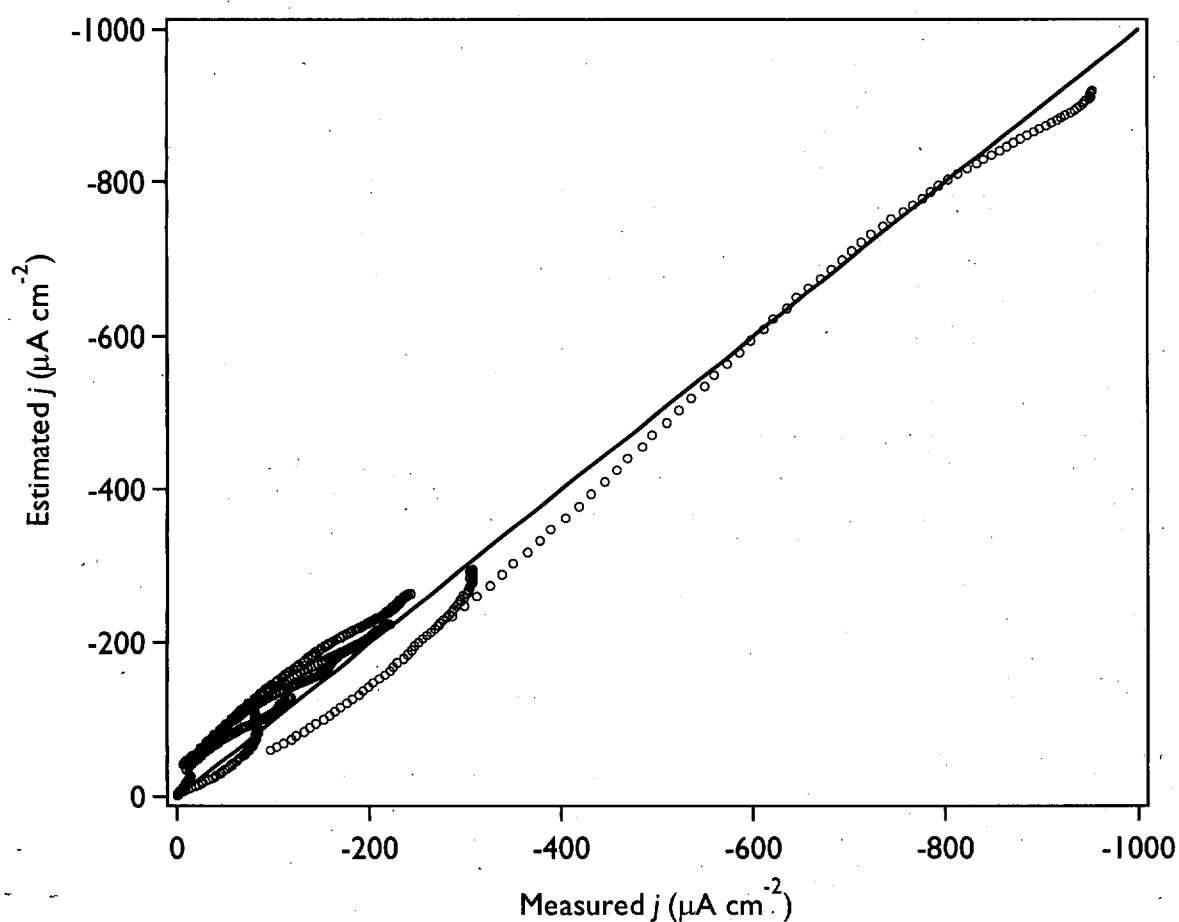

Figure S1. Comparison of estimated and measured current densities. Current densities were calculated with eq 15 and the global parameters given in Table 1. The solid line is given to show a 1:1 slope (i.e., perfect agreement between the model and experimentally measured observations).
